# Supplementary material for: Profiling small RNA reveals multimodal substructural signals in a Boltzmann ensemble
Source: PubMed Central journal article supplement — Nucleic Acids Res. 2014 Nov 11;42(22):e171. doi: 10.1093/nar/gku959 (PMC4267672; doi:10.1093/nar/gku959), 2014-11-11
Supplement: supp_gku959_nar-01603-met-n-2014-File004.pdf [file supp_gku959_nar-01603-met-n-2014-File004.pdf]

| Sequence | Helices      |       | Helix Classes |       | Features    |       | H:HC       |       | HC:F        |       | H:F         |       |
|----------|--------------|-------|---------------|-------|-------------|-------|------------|-------|-------------|-------|-------------|-------|
|          | Ave          | Stdev | Ave           | Stdev | Ave         | Stdev | Ave        | Stdev | Ave         | Stdev | Ave         | Stdev |
| V1       | 118.8        | 5.7   | 50.7          | 3.1   | 6.5         | 0.7   | 2.4        | 0.2   | 7.9         | 1.2   | <b>18.5</b> | 2.7   |
| V2       | 177.1        | 7.9   | 81.5          | 4.9   | 6.6         | 0.6   | 2.2        | 0.1   | <b>12.4</b> | 1.4   | <b>26.9</b> | 2.6   |
| V3       | <b>158.3</b> | 8.1   | <b>68.5</b>   | 4.2   | 8.1         | 0.7   | 2.3        | 0.1   | 8.6         | 1.1   | 19.8        | 2.2   |
| T1       | 133.7        | 6.5   | 59.0          | 3.9   | 10.4        | 0.8   | 2.3        | 0.1   | 5.7         | 0.6   | 12.9        | 1.4   |
| T2       | 98.4         | 8.0   | 43.4          | 5.1   | 6.8         | 0.4   | 2.3        | 0.1   | 6.3         | 0.7   | 14.4        | 1.2   |
| T3       | 102.7        | 6.0   | 49.8          | 4.3   | <b>5.0</b>  | 0.2   | 2.1        | 0.1   | 9.9         | 0.9   | 20.4        | 1.3   |
| S1       | 238.4        | 10.1  | 129.2         | 8.2   | 11.2        | 0.5   | <b>1.8</b> | 0.1   | 11.6        | 1.0   | 21.4        | 1.4   |
| S2       | 106.4        | 5.9   | 47.2          | 4.6   | 13.0        | 0.2   | 2.3        | 0.2   | 3.6         | 0.4   | 8.2         | 0.5   |
| S3       | <b>64.6</b>  | 7.0   | <b>23.0</b>   | 2.5   | 10.3        | 0.5   | <b>2.8</b> | 0.2   | <b>2.2</b>  | 0.3   | <b>6.3</b>  | 0.7   |
| H1       | 211.8        | 10.0  | 108.2         | 6.6   | 9.0         | 0.000 | 2.0        | 0.1   | 12.0        | 0.7   | 23.5        | 1.1   |
| H2       | 220.2        | 6.4   | 79.0          | 4.7   | <b>9.5</b>  | 0.5   | 2.8        | 0.1   | <b>8.3</b>  | 0.6   | 23.3        | 1.4   |
| H3       | 189.1        | 7.1   | 79.3          | 4.7   | 11.3        | 0.5   | 2.4        | 0.1   | 7.0         | 0.5   | 16.8        | 0.9   |
| P1       | <b>309.7</b> | 10.0  | <b>163.2</b>  | 7.1   | <b>13.9</b> | 0.3   | 1.9        | 0.1   | 11.8        | 0.5   | 22.3        | 0.9   |
| P2       | 172.1        | 9.7   | 86.6          | 5.6   | 9.8         | 0.8   | 2.0        | 0.1   | 8.9         | 1.0   | 17.7        | 2.0   |
| P3       | 94.8         | 6.3   | 41.7          | 3.7   | 8.0         | 0.2   | <b>2.3</b> | 0.1   | 5.2         | 0.5   | 11.8        | 0.9   |

Table 1: Data for Fig. 6a: the average and standard deviation in number of helices, helix classes and features, with amplification ratios calculated as average number of helices to helix classes, helix classes to features, and helices to features. Median, minimum and maximum values for averages are bolded.

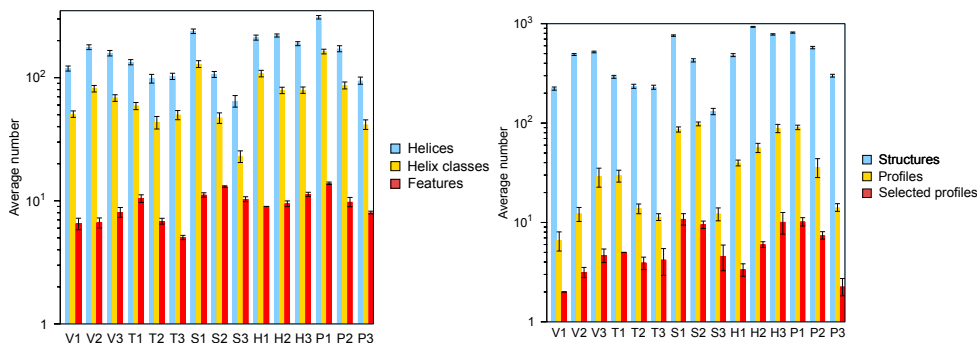

Figure 1: The average number of (left) helices, helix classes and features across 25 samples, and (right) structures, profiles and selected profiles across 25 samples, with bars indicating standard deviation. Log scale is used for additional clarity.

| Sequence | Structures   |       | Profiles    |       | S. Profiles |       | S:P         |       | P:SP        |       | S:SP         |       |
|----------|--------------|-------|-------------|-------|-------------|-------|-------------|-------|-------------|-------|--------------|-------|
|          | Ave          | Stdev | Ave         | Stdev | Ave         | Stdev | Ave         | Stdev | Ave         | Stdev | Ave          | Stdev |
| V1       | 222.5        | 8.3   | <b>6.6</b>  | 1.4   | <b>2.0</b>  | 0.0   | 35.9        | 10.3  | 3.3         | 0.7   | 111.2        | 4.1   |
| V2       | 489.8        | 10.9  | 12.2        | 2.0   | 3.2         | 0.4   | <b>41.2</b> | 6.7   | 3.9         | 0.5   | <b>156.7</b> | 15.0  |
| V3       | 519.5        | 10.1  | 28.9        | 6.3   | <b>4.7</b>  | 0.7   | 18.9        | 4.4   | <b>6.3</b>  | 1.8   | 114.1        | 20.0  |
| T1       | 292.1        | 9.8   | <b>29.5</b> | 4.0   | 5.0         | 0.0   | 10.1        | 1.5   | 5.9         | 0.8   | 58.4         | 2.0   |
| T2       | 234.7        | 11.1  | 13.8        | 1.5   | 3.9         | 0.6   | 17.2        | 2.0   | 3.6         | 0.7   | 61.0         | 8.6   |
| T3       | 229.7        | 10.8  | 11.4        | 0.9   | 4.2         | 1.3   | 20.3        | 1.7   | 3.1         | 1.3   | 61.8         | 24.8  |
| S1       | 759.1        | 12.9  | 86.4        | 5.1   | <b>10.8</b> | 1.4   | 8.8         | 0.5   | 8.1         | 1.1   | 71.3         | 9.8   |
| S2       | 427.9        | 16.1  | <b>98.2</b> | 4.3   | 9.5         | 0.8   | <b>4.4</b>  | 0.2   | 10.4        | 1.1   | 45.3         | 4.8   |
| S3       | <b>131.0</b> | 9.6   | 12.2        | 1.8   | 4.6         | 1.3   | 11.0        | 1.8   | <b>3.0</b>  | 1.3   | <b>32.0</b>  | 13.8  |
| H1       | <b>483.2</b> | 16.5  | 39.8        | 2.7   | 3.4         | 0.5   | 12.2        | 1.0   | <b>12.1</b> | 2.0   | 146.4        | 18.9  |
| H2       | <b>929.6</b> | 9.4   | 56.5        | 6.0   | 6.0         | 0.4   | <b>16.6</b> | 1.8   | 9.5         | 1.3   | 155.7        | 10.9  |
| H3       | 780.3        | 12.1  | 88.6        | 8.5   | 10.1        | 2.5   | 8.9         | 0.8   | 9.2         | 1.9   | 81.6         | 18.7  |
| P1       | 813.9        | 11.3  | 90.6        | 4.7   | 10.2        | 1.0   | 9.0         | 0.4   | 9.0         | 1.0   | <b>80.5</b>  | 7.9   |
| P2       | 575.1        | 15.9  | 36.1        | 7.8   | 7.4         | 0.6   | 16.7        | 3.7   | 4.9         | 1.2   | 77.8         | 6.4   |
| P3       | 300.0        | 9.6   | 14.2        | 1.3   | 2.3         | 0.4   | 21.3        | 2.0   | 6.4         | 1.1   | 136.0        | 22.8  |

Table 2: Data for Fig. 6b: the average and standard deviation in the number of collections of structures, profiles and selected profiles, with amplification ratio calculated as average number of structures to profiles, profiles to selected profiles, and structures to selected profiles. Median, minimum and maximum values for averages are bolded.

| Sequence | By Features |       | By Selected Profiles |       |
|----------|-------------|-------|----------------------|-------|
|          | Ave         | Stdev | Ave                  | Stdev |
| V1       | 95.8        | 0.6   | 94.2                 | 1.5   |
| V2       | 90.3        | 1.0   | 89.5                 | 1.9   |
| V3       | <b>89.5</b> | 1.0   | 80.8                 | 5.5   |
| T1       | 83.7        | 2.9   | <b>82.6</b>          | 2.7   |
| T2       | 94.8        | 0.6   | 92.9                 | 2.0   |
| T3       | 92.8        | 0.5   | <b>97.3</b>          | 1.7   |
| S1       | 82.7        | 1.1   | 65.0                 | 3.7   |
| S2       | 95.4        | 0.3   | 73.5                 | 2.1   |
| S3       | <b>99.4</b> | 0.1   | 97.0                 | 2.2   |
| H1       | 88.8        | 0.9   | 74.6                 | 2.7   |
| H2       | 88.5        | 1.1   | 72.7                 | 2.6   |
| H3       | 87.2        | 0.9   | 62.1                 | 4.9   |
| P1       | 78.6        | 0.8   | <b>50.5</b>          | 2.9   |
| P2       | <b>76.7</b> | 2.1   | 82.7                 | 8.2   |
| P3       | 96.7        | 0.3   | 89.0                 | 2.5   |

Table 3: Average (with standard deviation) percent coverage across 25 runs of helices by features, and structures by selected profiles. Median, minimum and maximum values for averages are bolded.

| Sequence | Features     |       | Selected profiles |       |
|----------|--------------|-------|-------------------|-------|
|          | Ave          | Stdev | Ave               | Stdev |
| V1       | 0.938        | 0.032 | <b>1.000</b>      | 0.000 |
| V2       | 0.944        | 0.055 | 0.809             | 0.066 |
| V3       | 0.952        | 0.038 | 0.895             | 0.075 |
| T1       | 0.957        | 0.011 | 0.805             | 0.098 |
| T2       | <b>0.981</b> | 0.008 | 0.854             | 0.081 |
| T3       | 0.994        | 0.031 | <b>0.839</b>      | 0.098 |
| S1       | 0.983        | 0.027 | 0.827             | 0.062 |
| S2       | 0.997        | 0.013 | 0.958             | 0.027 |
| S3       | 0.980        | 0.029 | 0.789             | 0.088 |
| H1       | <b>1.000</b> | 0.000 | 0.942             | 0.077 |
| H2       | 0.975        | 0.026 | 0.965             | 0.044 |
| H3       | 0.983        | 0.027 | 0.825             | 0.129 |
| P1       | 0.992        | 0.003 | 0.826             | 0.060 |
| P2       | <b>0.933</b> | 0.051 | <b>0.753</b>      | 0.048 |
| P3       | 0.996        | 0.021 | 0.933             | 0.108 |

Table 4: Average reproducibility across 25 runs with standard deviation. Median, minimum and maximum values for averages are bolded.

| <b>Qrr</b>  |            |             |            |
|-------------|------------|-------------|------------|
| Helix class | V1         | V2          | V3         |
| 1           | (1,16,6)   | (1,25,8)    | (59,88,10) |
| 2           | (38,56,7)  | (77,102,10) | (2,14,5)   |
| 3           | (64,88,10) | (47,64,7)   | (37,53,7)  |
| 4           | (31,63,6)  | (32,43,4)   | (22,33,4)  |
| 5           | (19,28,3)  | (27,47,5)   | (54,93,4)  |
| 6           | (21,30,1)  | (51,75,7)   | (1,16,1)   |
| 7           | (23,28,1)  | (29,71,3)   | (70,77,1)  |
| 8           | (23,34,4)  | (48,77,3)   | (59,89,3)  |
| 9           |            |             | (17,37,3)  |

Table 5: Potential features for Qrr sequences found across 25 runs, in (i,j,k) notation for associated maximal helix.

| <b>tRNA</b> |           |           | <b>5S ribosomal RNA</b> |             |            |            |             |
|-------------|-----------|-----------|-------------------------|-------------|------------|------------|-------------|
| Helix class | T1        | T2        | T3                      | Helix class | S1         | S2         | S3          |
| 1           | (1,13,4)  | (1,71,7)  | (1,72,7)                | 1           | (1,119,10) | (1,118,9)  | (3,133,9)   |
| 2           | (15,70,6) | (23,47,3) | (49,65,5)               | 2           | (33,88,10) | (25,63,7)  | (12,123,6)  |
| 3           | (48,64,5) | (27,43,5) | (26,44,6)               | 3           | (95,104,3) | (66,109,7) | (22,73,8)   |
| 4           | (36,47,4) | (48,64,5) | (9,26,5)                | 4           | (20,31,4)  | (84,93,3)  | (75,117,10) |
| 5           | (23,34,3) | (7,22,6)  | (31,40,3)               | 5           | (61,77,5)  | (78,99,5)  | (86,106,8)  |
| 6           | (26,42,5) | (31,40,3) | (52,61,3)               | 6           | (91,107,3) | (31,44,4)  | (37,57,4)   |
| 7           | (29,54,5) | (19,51,3) |                         | 7           | (48,57,3)  | (22,53,3)  | (43,51,3)   |
| 8           | (25,59,6) |           |                         | 8           | (89,108,4) | (28,48,2)  | (32,62,3)   |
| 9           | (21,47,2) |           |                         | 9           | (46,55,3)  | (14,65,2)  | (93,100,2)  |
| 10          | (24,44,1) |           |                         | 10          | (10,22,5)  | (76,100,1) | (29,67,3)   |
| 11          | (14,72,5) |           |                         | 11          | (60,69,3)  | (75,102,2) | (35,61,2)   |
|             |           |           |                         | 12          | (25,108,4) | (29,48,4)  |             |
|             |           |           |                         | 13          |            | (73,103,2) |             |
|             |           |           |                         | 14          |            | (35,42,2)  |             |

Table 6: Potential features for tRNA and for 5S ribosomal RNA sequences found across 25 runs, in (i,j,k) notation for associated maximal helix.

| <b>THF riboswitch</b> |           |           | <b>TPP riboswitch</b> |             |           |            |           |
|-----------------------|-----------|-----------|-----------------------|-------------|-----------|------------|-----------|
| Helix class           | H1        | H2        | H3                    | Helix class | P1        | P2         | P3        |
| 1                     | (1,99,5)  | (10,88,6) | (10,79,10)            | 1           | (16,31,6) | (1,86,4)   | (6,88,5)  |
| 2                     | (72,89,7) | (28,54,8) | (1,91,5)              | 2           | (37,50,5) | (56,67,4)  | (62,75,4) |
| 3                     | (10,30,8) | (59,75,7) | (28,52,7)             | 3           | (68,81,4) | (6,81,5)   | (16,27,4) |
| 4                     | (57,62,1) | (34,49,6) | (35,46,4)             | 4           | (12,57,5) | (49,74,4)  | (32,44,5) |
| 5                     | (49,73,5) | (1,101,5) | (58,66,2)             | 5           | (1,81,7)  | (13,43,5)  | (56,81,4) |
| 6                     | (38,94,5) | (16,83,4) | (26,55,3)             | 6           | (61,73,5) | (19,37,4)  | (11,51,5) |
| 7                     | (54,64,2) | (20,78,3) | (22,62,5)             | 7           | (10,58,6) | (23,30,2)  | (11,50,4) |
| 8                     | (40,93,4) | (5,94,4)  | (25,54,2)             | 8           | (62,88,3) | (10,47,3)  | (56,82,3) |
| 9                     | (55,67,2) | (17,84,7) | (16,70,6)             | 9           | (30,37,2) | (71,80,3)  | (60,78,2) |
| 10                    |           | (35,45,3) | (19,69,3)             | 10          | (19,48,5) | (9,69,5)   |           |
| 11                    |           |           | (7,85,1)              | 11          | (26,41,3) | (20,59,10) |           |
| 12                    |           |           | (54,69,2)             | 12          | (54,69,2) | (5,96,6)   | (53,71,3) |
|                       |           |           |                       | 13          |           | (10,59,1)  |           |
|                       |           |           |                       | 14          | (62,87,3) |            |           |

Table 7: Potential features for THF riboswitch and for TPP riboswitch sequences found across 25 runs, in (i,j,k) notation for associated maximal helix.

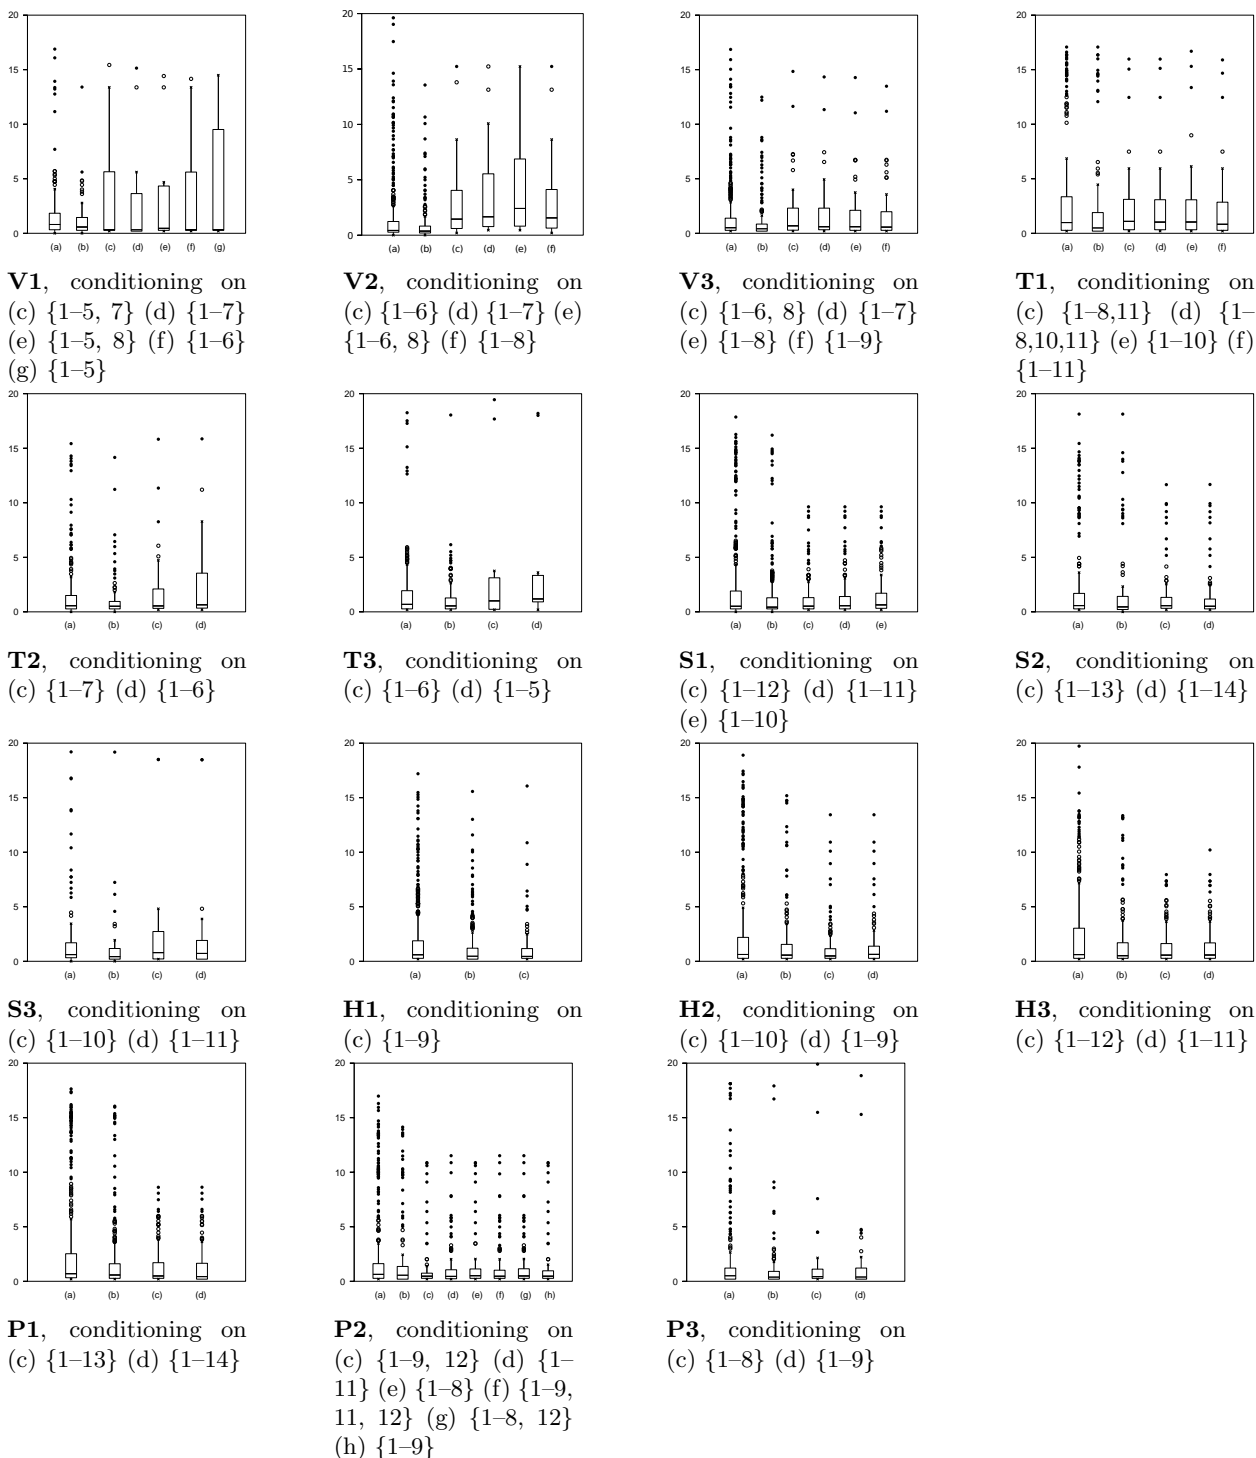

Figure 2: Columns from left to right indicate respectively standard deviations in frequency for base pairs, helix classes, and profiles conditioned on feature sets encountered in 25 samples for a given sequence. Helix classes specific to each sequence are listed by maximal helices in Tables 5, 6, and 7. Using standard deviations in base pair frequencies as a benchmark (leftmost boxplot), we observe that all the other boxplots to the right of leftmost exhibit behavior comparable to or less variable than the benchmark, regardless of conditioning.
